# Supplementary material for: Wind Driving Longer Uncontrolled Large Fire Duration in the Western United States
Source: Research Square preprint supplement (doi:10.21203/rs.3.rs-3969193/v1), 2024-03-14
Supplement: Supplementary file 1 [file 649632c0a6888ef04317ac6b.pdf]

# **Wind Driving Longer Uncontrolled Larger Fire Duration in the Western United States**

**Sally S.-C. Wang<sup>1</sup>, L. Ruby Leung<sup>1</sup>, Yun Qian<sup>1</sup>**

<sup>1</sup> Atmospheric, Climate, and Earth Sciences Division, Pacific Northwest National Laboratory, Richland, Washington, USA

Corresponding author: Sally S.-C. Wang ([sing-chun.wang@pnnl.gov](mailto:sing-chun.wang@pnnl.gov)) and L. Ruby Leung ([Ruby.Leung@pnnl.gov](mailto:Ruby.Leung@pnnl.gov))

**----- Supplementary Material -----**

**Table S1.** Regression coefficients of MLR models of different ecoregions in the western US for the two fire seasons. \*\* indicates statistical significance at the p-values shown.

|                                             | R <sup>2</sup> | Intercept | Maximum wind speed within the fire duration | Mean wind speed within the fire duration | Standard deviation of the daily wind speed ± 7 days | Elevation | Mean wind speed (seasonal) | Mean VPD (seasonal) | Mean temperature (seasonal) |
|---------------------------------------------|----------------|-----------|---------------------------------------------|------------------------------------------|-----------------------------------------------------|-----------|----------------------------|---------------------|-----------------------------|
| <b>JJA models</b>                           |                |           |                                             |                                          |                                                     |           |                            |                     |                             |
| Eco 3 – Cold deserts                        | 0.84           | 10.44     | 8.75**                                      | -5.65*                                   |                                                     |           |                            |                     |                             |
| Eco 4 – Warm deserts                        | 0.71           | 9.65      | 8.63**                                      | -6.96**                                  |                                                     |           |                            |                     |                             |
| Eco 5 – Mediterranean California            | 0.76           | 10.94     | 13.29**                                     | 5.73**                                   |                                                     |           |                            |                     |                             |
| Eco 6 – Western Sierra Madre                | 0.63           | 9.34      | 6.70**                                      | -4.07**                                  | -3.14**                                             | 0.60      |                            |                     |                             |
| Eco 8 – Upper Gila Mountains                | 0.63           | 28.98     | 16.09**                                     | -10.27**                                 | -4.41**                                             | 1.99**    |                            |                     |                             |
| Eco 40 – Western Cordillera                 | 0.74           | 41.58     | 14.52**                                     | -8.59**                                  |                                                     |           |                            |                     |                             |
| Eco 48 – Western-Central Semi-Arid Prairies | 0.36           | 6.28      | 5.07**                                      | -2.80*                                   | -3.01**                                             |           |                            |                     |                             |
| Eco 49 – South-Central Semi-Arid Prairies   | 0.51           | 5.17      | 11.10*                                      | -7.69*                                   |                                                     |           |                            |                     |                             |
| <b>SON models</b>                           |                |           |                                             |                                          |                                                     |           |                            |                     |                             |
| Eco 3 – Cold deserts                        | 0.57           | 6.17      | 3.76**                                      | -1.61*                                   |                                                     | 0.602     |                            |                     | 1.74**                      |
| Eco 5 – Mediterranean California            | 0.77           | 9.36      | 6.73**                                      | -5.31**                                  |                                                     | 1.99**    |                            | 2.54**              |                             |
| Eco 40 – Western Cordillera                 | 0.70           | 22.43     | 13.03**                                     | -7.96**                                  |                                                     |           | 3.11*                      |                     |                             |
| Eco 48 – Western-Central Semi-Arid Prairies | 0.54           | 4.32      |                                             |                                          | -4.91**                                             | 1.98**    | 3.91**                     |                     |                             |

**Table S2.** The regression fits for the original model and the sensitivity experiments

|                                                                                                           | Intercept | Maximum wind speed during fires | Mean wind speed during fires | Mean LAI (seasonal, ig) | Mean temperature (seasonal) | Mean slope | Mean elevation | Mean burned area |
|-----------------------------------------------------------------------------------------------------------|-----------|---------------------------------|------------------------------|-------------------------|-----------------------------|------------|----------------|------------------|
| <b>JJA</b>                                                                                                |           |                                 |                              |                         |                             |            |                |                  |
| <b>Ori: Model (R<sup>2</sup>=0.90, AdjR<sup>2</sup>=0.89)</b>                                             |           |                                 |                              |                         |                             |            |                |                  |
| <b>Exp1: Model (R<sup>2</sup>=0.77, AdjR<sup>2</sup>=0.75) – Remove Max wind and add mean burned area</b> |           |                                 |                              |                         |                             |            |                |                  |
| Coefficient                                                                                               | 21.11     |                                 | 0.09                         | 7.39                    |                             |            |                | 4.45             |
| p-value                                                                                                   | P<<0.05*  |                                 | 0.93                         | P<<0.05*                |                             |            |                | P<<0.05*         |
| <b>Exp2: Model (R<sup>2</sup>=0.92, AdjR<sup>2</sup>=0.91) – Include Max wind and mean burned area</b>    |           |                                 |                              |                         |                             |            |                |                  |

|                                                                                                           |               |               |               |          |       |      |      |       |
|-----------------------------------------------------------------------------------------------------------|---------------|---------------|---------------|----------|-------|------|------|-------|
| <b>Coefficien<br/>t</b>                                                                                   | 21.11         | 6.68          | -1.98         | 3.07     |       |      |      | 1.78  |
| <b>p-value</b>                                                                                            | P<<0.05*<br>* | P<<0.05*<br>* | P<<0.05*<br>* | 0.0016** |       |      |      | 0.02* |
| <b>SON</b>                                                                                                |               |               |               |          |       |      |      |       |
| <b>Ori: Model (R<sup>2</sup>=0.83, AdjR<sup>2</sup>=0.79)</b>                                             |               |               |               |          |       |      |      |       |
| <b>Exp1: Model (R<sup>2</sup>=0.56, AdjR<sup>2</sup>=0.46) – Remove Max wind and add mean burned area</b> |               |               |               |          |       |      |      |       |
| <b>Coefficien<br/>t</b>                                                                                   | 12.55         |               | 2.11          |          | 2.52  | 2.20 | 2.28 | 1.83  |
| <b>p-value</b>                                                                                            | P<<0.05*<br>* |               | 0.08          |          | 0.03* | 0.06 | 0.05 | 0.11  |
| <b>Exp2: Model (R<sup>2</sup>=0.85, AdjR<sup>2</sup>=0.80) – Include Max wind and mean burned area</b>    |               |               |               |          |       |      |      |       |
| <b>Coefficien<br/>t</b>                                                                                   | 12.55         | 5.80          | -0.24         |          | 0.86  | 1.17 | 0.75 | 1.02  |
| <b>p-value</b>                                                                                            | P<<0.05*<br>* | P<<0.05*<br>* | 0.75          |          | 0.24  | 0.10 | 0.30 | 0.14  |

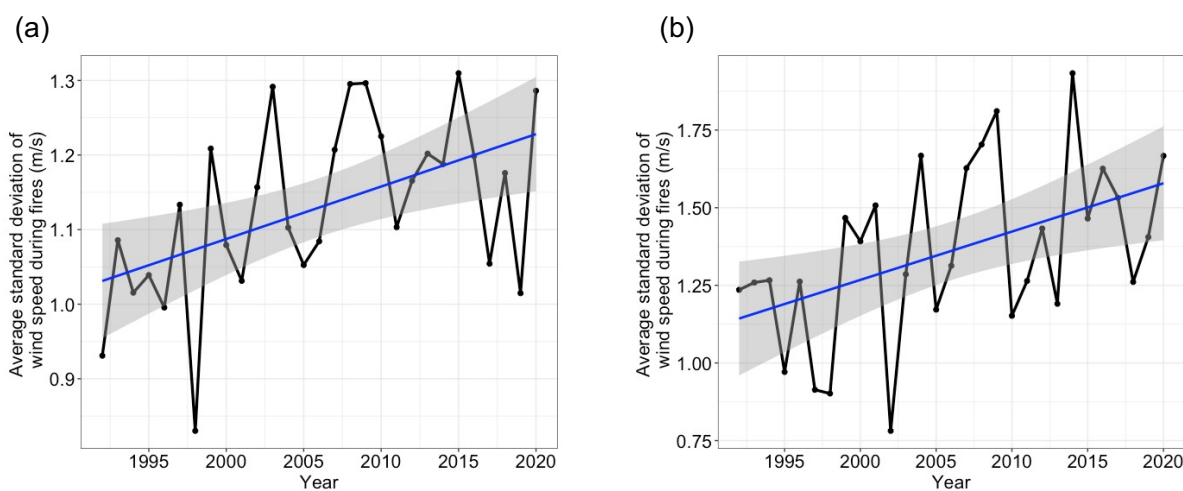

**Fig S1.** Increasing trends in average standard deviation of daily wind speed during large fires for 1992-2020 over the western US (<103° W) for (a) June-July-August (JJA) and (b) September-October-November (SON). The shaded area shows the 90% confidence intervals of the regression trend. The trends are 0.007 m/s yr<sup>-1</sup> (p<<0.05) and 0.016 m/s yr<sup>-1</sup> (p<<0.05) for JJA and SON, respectively.

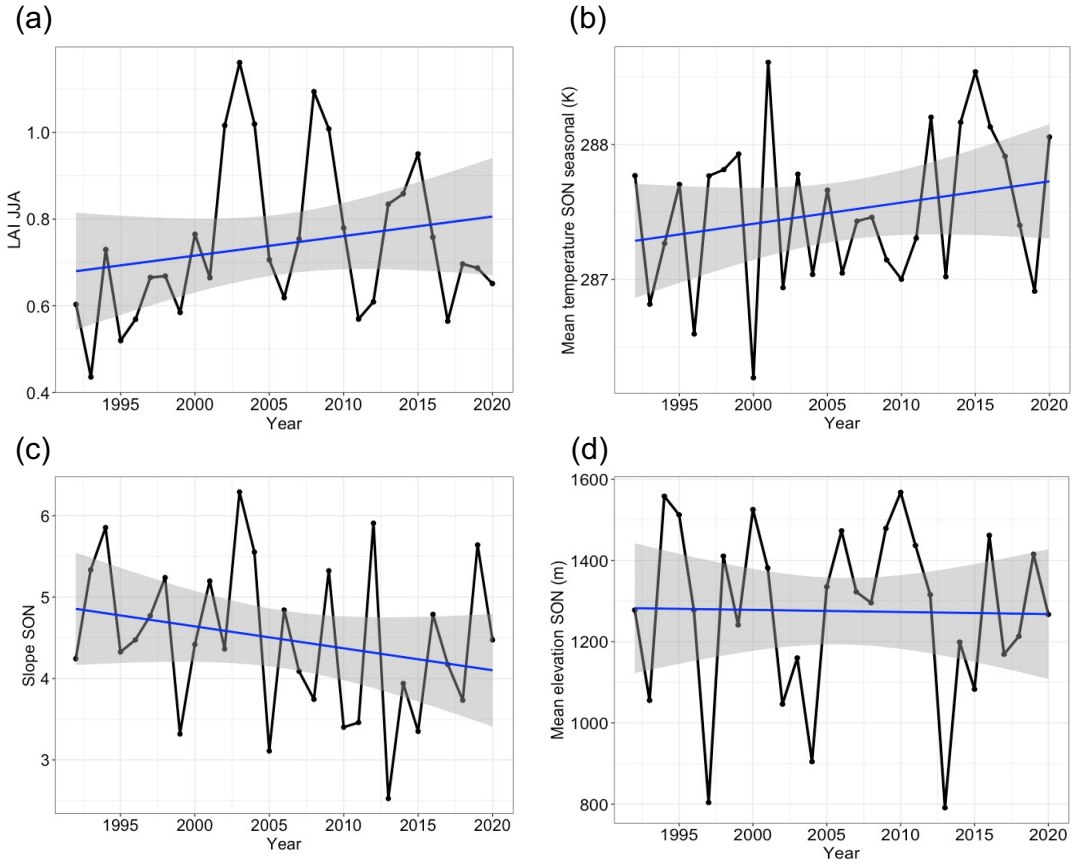

**Fig S2.** Observed average (a) seasonal mean LAI in JJA, (b) seasonal mean temperature in SON, (c) mean slope in SON, and (d) mean elevation in SON during large fires for 1992-2020 over the western US ( $<103^{\circ}$  W). The shaded area shows the 90% confidence intervals of the regression trend.

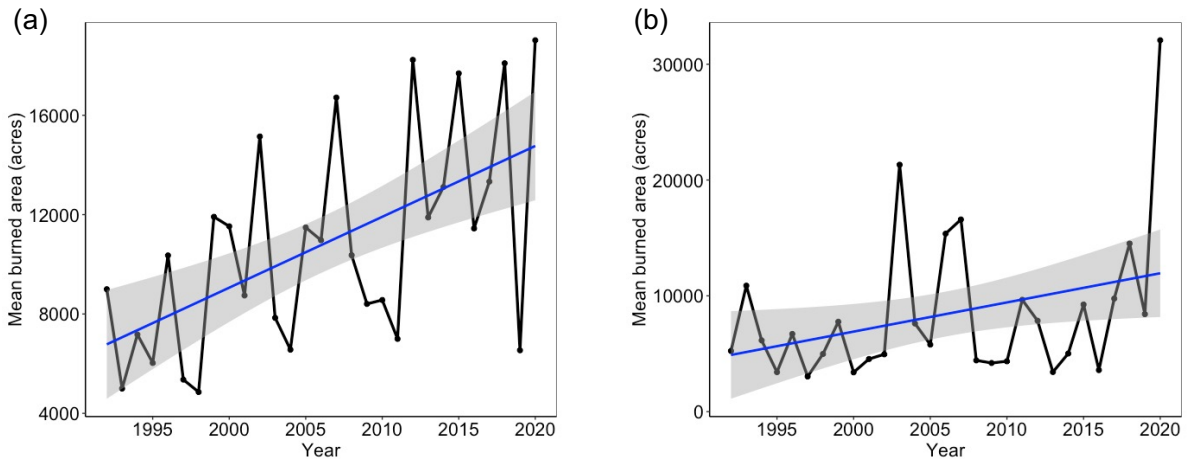

**Fig S3.** Time series of mean burned area over the western US ( $<103^{\circ}$ W) during 1992-2020 for (a) JJA and (b) SON.

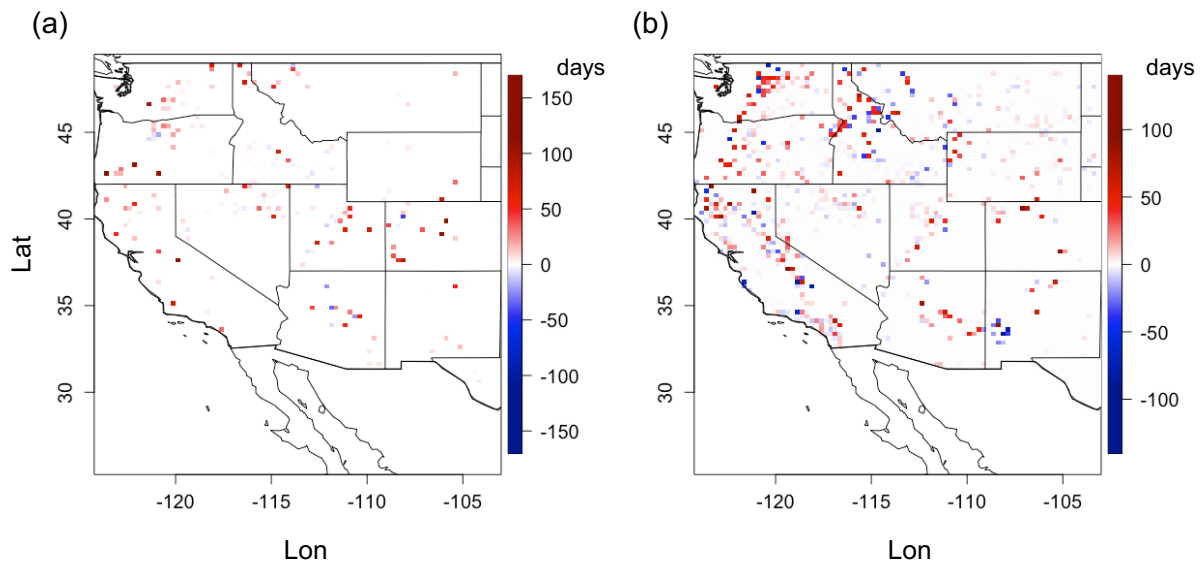

**Fig S4.** Spatial distribution of the differences in large fire durations between 2007-2020 and 1992-2006 for (a) JJA and (b) SON.

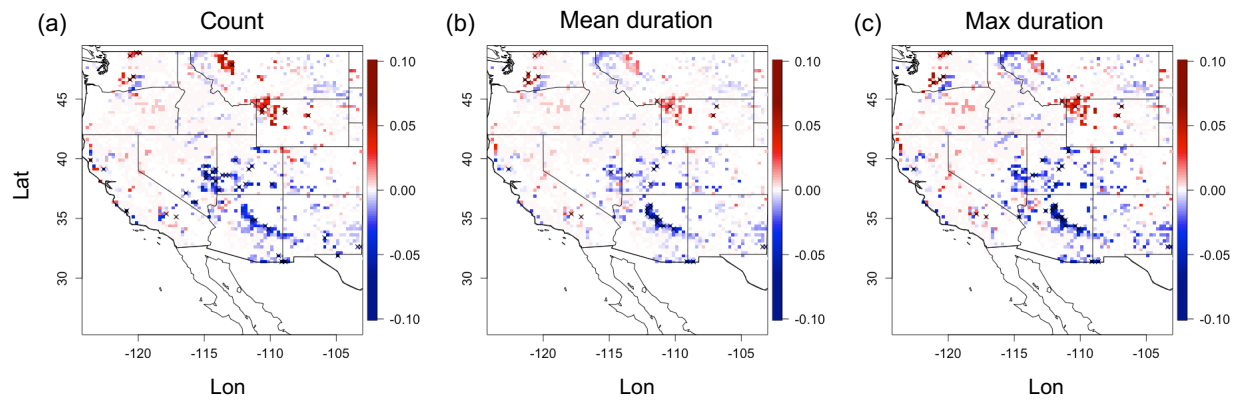

**Fig S5.** Observed trends in (a) count, (b) mean duration, and (c) maximum duration of strong wind events during JJA for 1992-2020 over the western US ( $<103^{\circ}\text{W}$ ). Trends that are statistically significant above 95% confidence level are marked with black crosses.

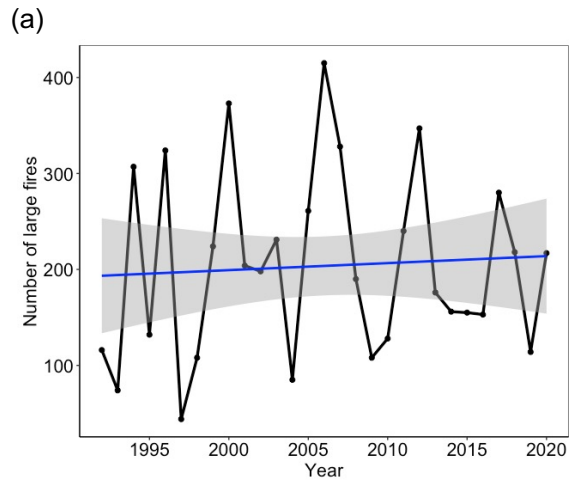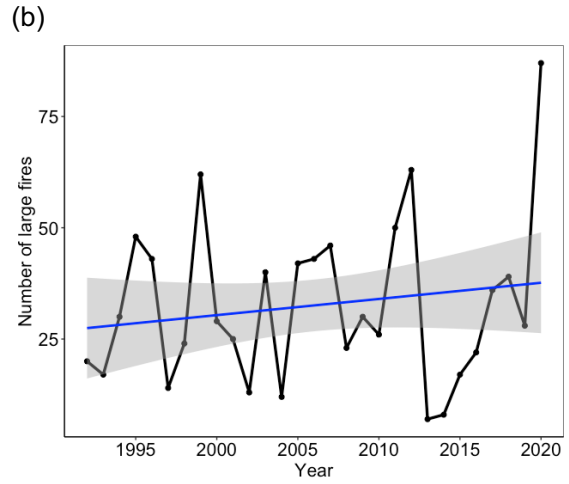

**Fig S6.** Time series of number of large fires used in the analysis during 1992-2020 for (a) JJA and (b) SON.
